# Supplementary material for: PET imaging of [11C]PBR28 in Parkinson’s disease patients does not indicate increased binding to TSPO despite reduced dopamine transporter binding
Source: Springer Nature journal article supplement (doi:10.1007/s00259-018-4161-6), 2018-09-30
Supplement: MOESM1 [file 16164738]

## Supplementary Information

### PET imaging of [<sup>11</sup>C]PBR28 in Parkinson's disease patients does not indicate increased binding to TSPO despite reduced dopamine transporter binding

European Journal of Nuclear Medicine and Molecular Imaging

**Authors:** Katarina Varnäs, Zsolt Cselényi, Aurelija Jucaite, Christer Halldin, Per Svenningsson, Lars Farde, Andrea Varrone

**Correspondence:** Katarina Varnäs, Karolinska Institutet, Department of Clinical Neuroscience, Centre for Psychiatry Research, Karolinska University Hospital, Stockholm, Sweden

Email: [katarina.varnas@ki.se](mailto:katarina.varnas@ki.se)

## Supplementary Tables

**Table S1** Volumes of the brain structures analysed. Volumes of the brain regions were estimated using the software package FreeSurfer

| Brain region              | Volume, mean (SD)                |                             |
|---------------------------|----------------------------------|-----------------------------|
|                           | Control subjects ( <i>n</i> =16) | PD patients ( <i>n</i> =16) |
| Intracranial volume (mL)  | 1657 (159)                       | 1843 (111)                  |
| <u>Relative volumes *</u> |                                  |                             |
| Caudate nucleus           | 0.42 (0.042)                     | 0.41 (0.039)                |
| Putamen                   | 0.59 (0.047)                     | 0.58 (0.076)                |
| Limbic cortices           | 2.3 (0.17)                       | 2.0 (0.20)                  |
| Thalamus                  | 0.83 (0.081)                     | 0.91 (0.063)                |
| Cerebellum                | 7.0 (0.70)                       | 7.2 (0.56)                  |

\* Absolute volume divided by intracranial volume and multiplied by 100.

**Table S2**  $V_T$  values for [ $^{11}\text{C}$ ]PBR28 for the different diagnostic and genotype groups obtained using ROI definitions in normalized space. Values are presented as mean (SD). MAB, Mixed-affinity binder; HAB, high-affinity binder

| Brain region         | Control subjects |            |                | PD patients |            |                |
|----------------------|------------------|------------|----------------|-------------|------------|----------------|
|                      | MAB              | HAB        | Difference (%) | MAB         | HAB        | Difference (%) |
| Whole brain          | 2.1 (0.38)       | 3.1 (0.55) | 31             | 2.0 (0.36)  | 3.2 (0.49) | 36             |
| Substantia nigra     | 2.5 (0.45)       | 3.6 (0.92) | 30             | 2.4 (0.44)  | 3.6 (0.68) | 34             |
| Caudate nucleus      | 1.9 (0.39)       | 2.9 (0.56) | 36             | 1.7 (0.30)  | 2.5 (0.45) | 30             |
| Putamen              | 2.3 (0.53)       | 3.4 (0.60) | 31             | 2.1 (0.33)  | 3.6 (0.83) | 41             |
| Nigro-striatal tract | 2.8 (0.49)       | 4.4 (0.99) | 36             | 2.6 (0.44)  | 4.3 (0.78) | 39             |
| Limbic cortices      | 2.3 (0.43)       | 3.4 (0.64) | 32             | 2.1 (0.41)  | 3.3 (0.49) | 36             |
| Thalamus             | 2.8 (0.51)       | 4.3 (1.0)  | 36             | 2.6 (0.50)  | 4.2 (0.69) | 37             |
| Cerebellum           | 2.2 (0.38)       | 3.2 (0.57) | 32             | 2.1 (0.46)  | 3.6 (0.56) | 42             |

**Table S3**  $V_T$  values, mean (SD) for [ $^{11}\text{C}$ ]PBR28 obtained using ROI definitions in individual space. MAB, Mixed-affinity binder; HAB, high-affinity binder

| Brain region         | Control subjects |            |                | PD patients |            |                |
|----------------------|------------------|------------|----------------|-------------|------------|----------------|
|                      | MAB              | HAB        | Difference (%) | MAB         | HAB        | Difference (%) |
| Whole brain          | 2.2 (0.39)       | 3.1 (0.54) | 31             | 2.0 (0.35)  | 3.2 (0.53) | 37             |
| Substantia nigra     | 2.5 (0.42)       | 3.5 (0.94) | 28             | 2.3 (0.44)  | 3.5 (0.67) | 34             |
| Caudate nucleus      | 1.9 (0.40)       | 2.9 (0.51) | 35             | 1.8 (0.32)  | 2.6 (0.47) | 33             |
| Putamen              | 2.3 (0.50)       | 3.4 (0.61) | 33             | 2.1 (0.32)  | 3.5 (0.74) | 41             |
| Nigro-striatal tract | 2.8 (0.51)       | 4.4 (0.83) | 35             | 2.8 (0.44)  | 4.7 (1.1)  | 42             |
| Limbic cortices      | 2.4 (0.45)       | 3.4 (0.64) | 31             | 2.2 (0.41)  | 3.4 (0.56) | 36             |
| Thalamus             | 2.8 (0.52)       | 4.3 (0.92) | 35             | 2.7 (0.49)  | 4.5 (0.92) | 40             |
| Cerebellum           | 2.2 (0.42)       | 3.2 (0.57) | 32             | 2.1 (0.43)  | 3.7 (0.67) | 43             |

**Table S4** Average standardized uptake values for [<sup>11</sup>C]PBR28 radioactivity concentration between 40 and 60 minutes after injection. Mean (SD) for diagnostic and genotype groups. MAB, Mixed-affinity binder; HAB, high-affinity binder

| Brain region         | Control subjects |            |                | PD patients |            |                |
|----------------------|------------------|------------|----------------|-------------|------------|----------------|
|                      | MAB              | HAB        | Difference (%) | MAB         | HAB        | Difference (%) |
| Whole brain          | 0.81 (0.12)      | 1.1 (0.23) | 28             | 0.84 (0.14) | 1.1 (0.20) | 25             |
| Substantia nigra     | 0.97 (0.16)      | 1.3 (0.32) | 25             | 1.0 (0.20)  | 1.4 (0.22) | 26             |
| Caudate nucleus      | 0.71 (0.14)      | 1.1 (0.22) | 34             | 0.75 (0.16) | 1.0 (0.18) | 23             |
| Putamen              | 0.84 (0.14)      | 1.2 (0.25) | 30             | 0.85 (0.16) | 1.2 (0.26) | 30             |
| Nigro-striatal tract | 1.0 (0.15)       | 1.5 (0.29) | 30             | 1.1 (0.16)  | 1.6 (0.32) | 30             |
| Limbic cortices      | 0.87 (0.13)      | 1.2 (0.26) | 29             | 0.89 (0.16) | 1.2 (0.20) | 25             |
| Thalamus             | 1.0 (0.18)       | 1.5 (0.31) | 29             | 1.1 (0.20)  | 1.5 (0.29) | 27             |
| Cerebellum           | 0.78 (0.16)      | 1.1 (0.27) | 30             | 0.82 (0.17) | 1.2 (0.25) | 34             |

## Supplementary Figures

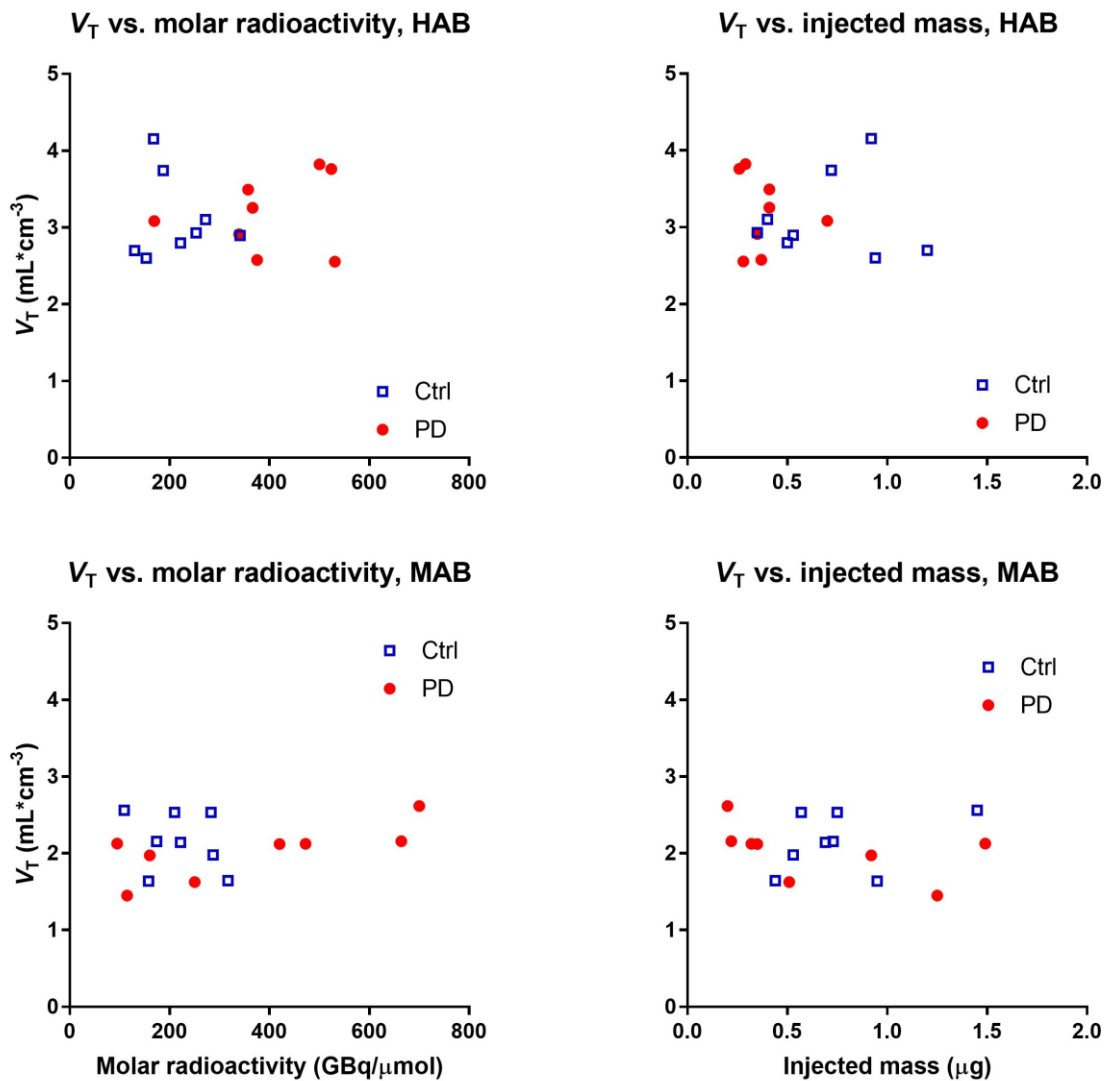

**Figure S1** Relationship between [<sup>11</sup>C]PBR28 whole brain  $V_T$  values and molar radioactivity (left), and injected mass (right) for high-affinity binders (HAB; upper panel) and mixed-affinity binders (MAB; lower panel)

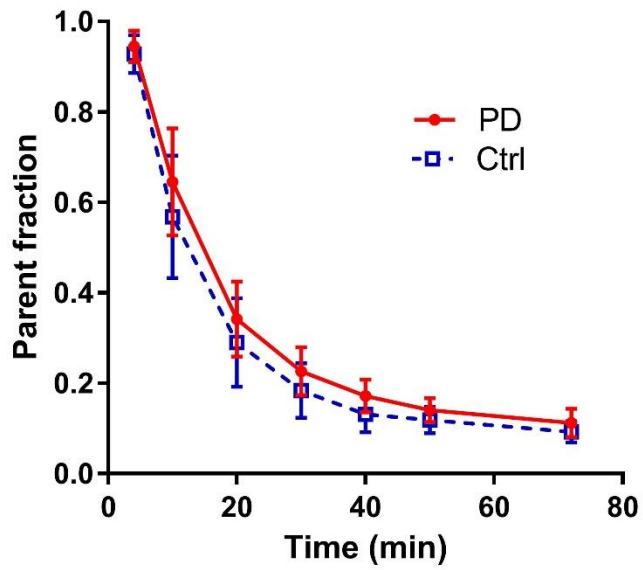

**Figure S2** Plasma radiometabolism for [11C]PBR28 in control subjects and PD patients. Data are presented as mean (SD) of the fraction of unchanged radioligand in plasma

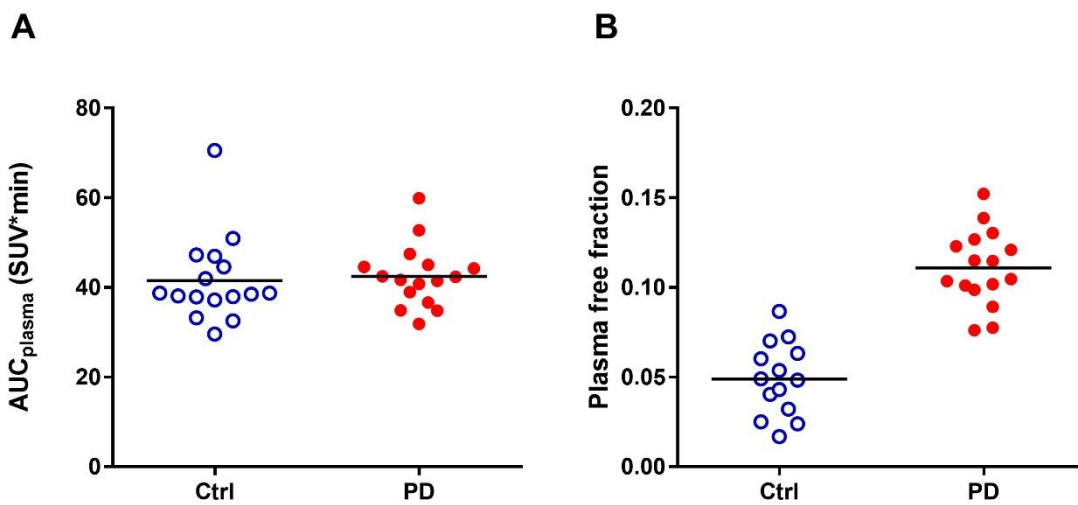

**Figure S3** Area under the curve for plasma radioactivity (A) and the free fraction of radioligand in plasma (B) for [11C]PBR28 in control subjects and PD patients

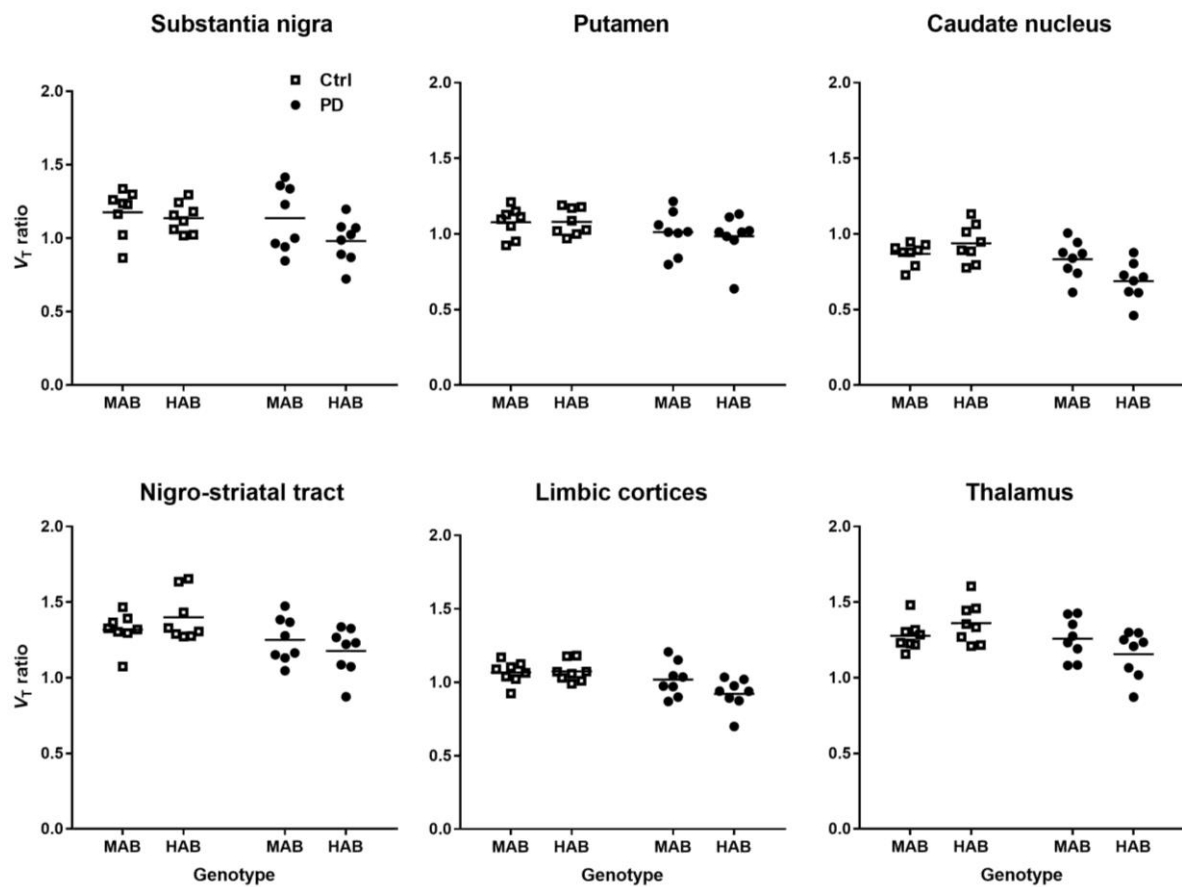

**Figure S4** [ $^{11}\text{C}$ ]PBR28 distribution volume ratio for regions of interest relative to the cerebellum for control subjects and PD patients
